# Supplementary material for: Lysosomal degradation of PD-L1 is associated with immune-related adverse events during anti-PD-L1 immunotherapy in NSCLC patients
Source: bioRxiv or medRxiv preprint supplement (doi:10.1101/2024.01.21.24301536), 2024-01-22
Supplement: Supplementary file [file media-2.pdf]

**Supplementary Table 1** Patient characteristics

| Variable         |                         | All patients<br>(N=72) | anti-PD-1<br>(N=48) | anti-PD-L1<br>(N=24) | p value |
|------------------|-------------------------|------------------------|---------------------|----------------------|---------|
| ICI treatment    |                         |                        |                     |                      |         |
|                  | Nivolumab               | 20 (27.8%)             | 20 (41.6%)          |                      |         |
|                  | Pembrolizumab           | 28 (38.9%)             | 28 (58.3%)          |                      |         |
|                  | Atezolizumab            | 16 (22.2%)             |                     | 16 (66.7%)           |         |
|                  | Durvalumab              | 8 (11.1%)              |                     | 8 (33.3%)            |         |
| Age              | Median (range)          | 67 (28-88)             | 70 (28-88)          | 62 (43-77)           | 0.0551  |
| Gender           |                         |                        |                     |                      |         |
|                  | Male                    | 56 (77.8%)             | 36 (75.0%)          | 20 (83.3%)           | 0.4227  |
|                  | Female                  | 16 (22.2%)             | 12 (25.0%)          | 4 (16.7%)            |         |
| Smoking          |                         |                        |                     |                      |         |
|                  | Never                   | 11 (15.3%)             | 6 (12.5%)           | 5 (20.8%)            | 0.3542  |
|                  | Current or Former       | 61 (84.7%)             | 42 (87.5%)          | 19 (79.2%)           |         |
| EGFR Mutation    |                         |                        |                     |                      |         |
|                  | Wild                    | 60 (88.2%)             | 42 (87.5%)          | 18 (90.0%)           | 0.7706  |
|                  | Mutant                  | 8 (11.8%)              | 6 (12.5%)           | 2 (10.0%)            |         |
| T                |                         |                        |                     |                      |         |
|                  | -1c                     | 18 (25.0%)             | 14 (29.2%)          | 4 (16.7%)            | 0.2482  |
|                  | 2a-                     | 54 (75.0%)             | 34 (70.8%)          | 20 (83.3%)           |         |
| N                |                         |                        |                     |                      |         |
|                  | 0                       | 11 (15.3%)             | 9 (18.8%)           | 2 (8.3%)             | 0.2468  |
|                  | 1-                      | 61 (84.7%)             | 39 (81.2%)          | 22 (91.7%)           |         |
| M                |                         |                        |                     |                      |         |
|                  | 0                       | 49 (68.1%)             | 30 (62.5%)          | 19 (79.2%)           | 0.1528  |
|                  | 1                       | 23 (31.9%)             | 18 (37.5%)          | 5 (20.8%)            |         |
| Stage            |                         |                        |                     |                      |         |
|                  | -II                     | 10 (13.9%)             | 9 (18.8%)           | 1 (4.2%)             | 0.0916  |
|                  | III-                    | 62 (86.1%)             | 39 (81.2%)          | 23 (95.8%)           |         |
| Pathology        |                         |                        |                     |                      |         |
|                  | Squamous cell carcinoma | 32 (44.4%)             | 24 (50.0%)          | 8 (33.3%)            | 0.2451  |
|                  | Adenocarcinoma          | 32 (44.4%)             | 18 (37.5%)          | 14 (58.3%)           |         |
|                  | Non-small               | 8 (11.2%)              | 6 (12.5%)           | 2 (8.4%)             |         |
| PD-L1 TPS status |                         |                        |                     |                      |         |
|                  | <50                     | 31 (52.5%)             | 19 (46.3%)          | 12 (66.7%)           | 0.1500  |
|                  | 50≤                     | 28 (47.5%)             | 22 (53.7%)          | 6 (33.3%)            |         |
